# Supplementary material
Source: PubMed Central journal article supplement (PMC6336224)

**Supplementary Figure 1:** Healthcare expenditure as % GDP for participating countries classified by 2014 World Bank income groups.

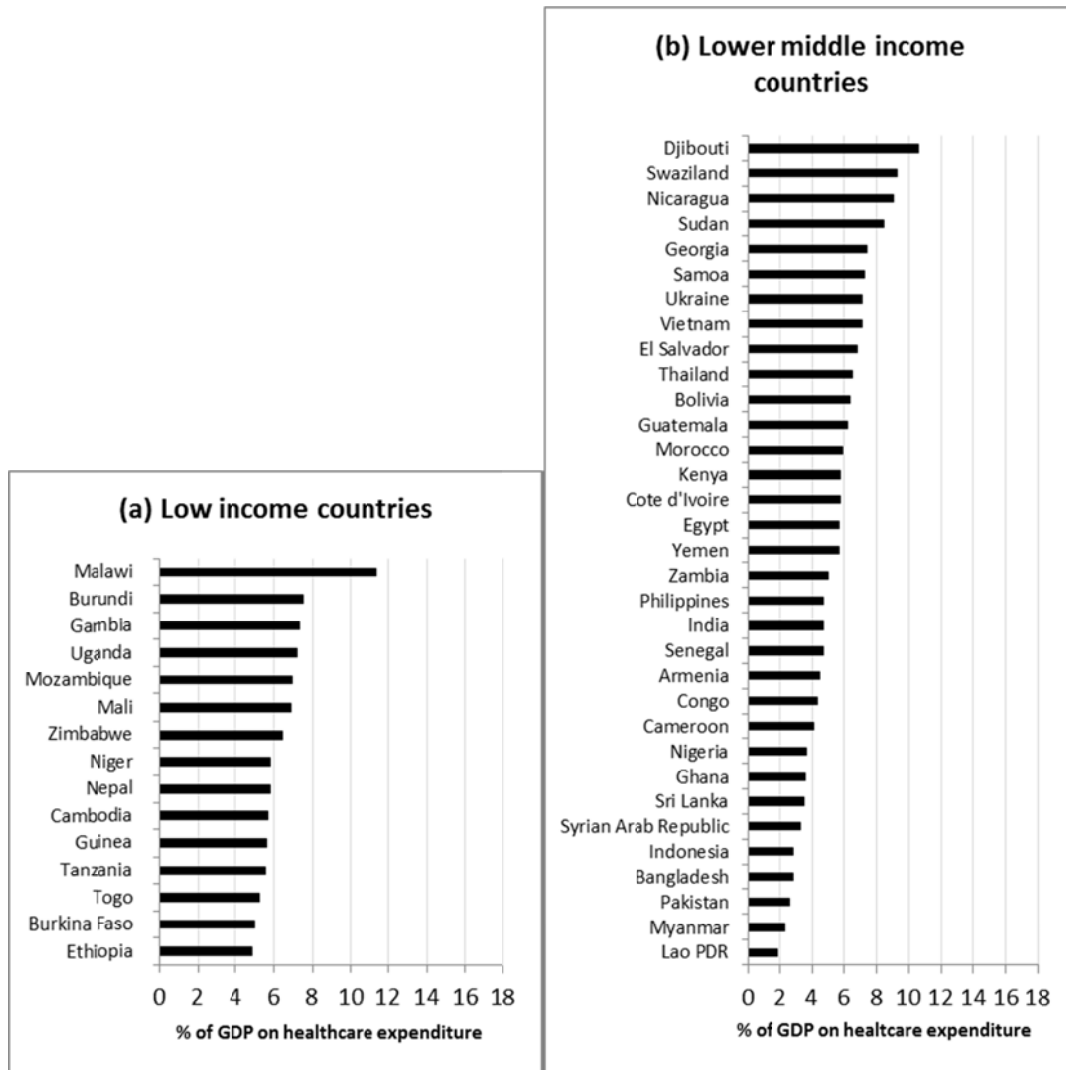

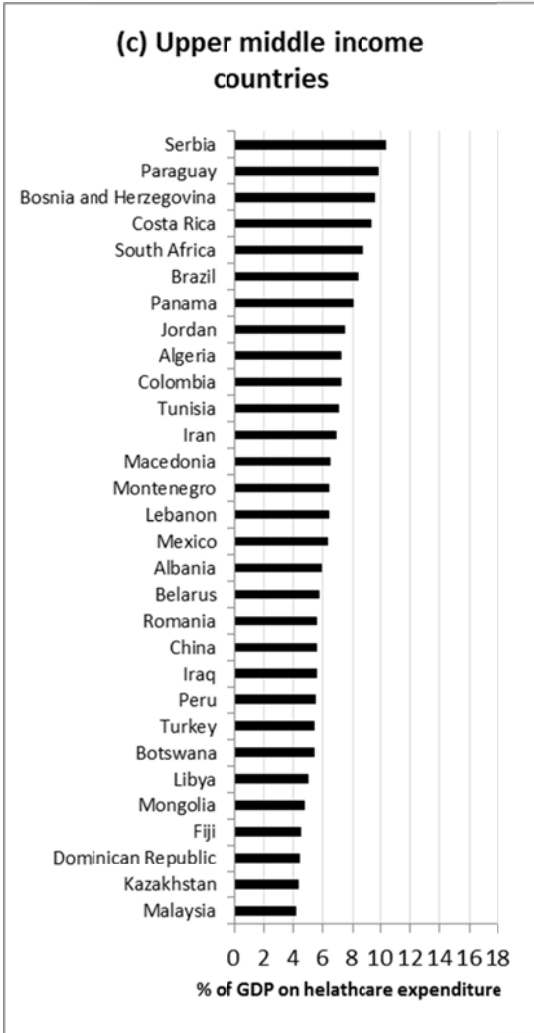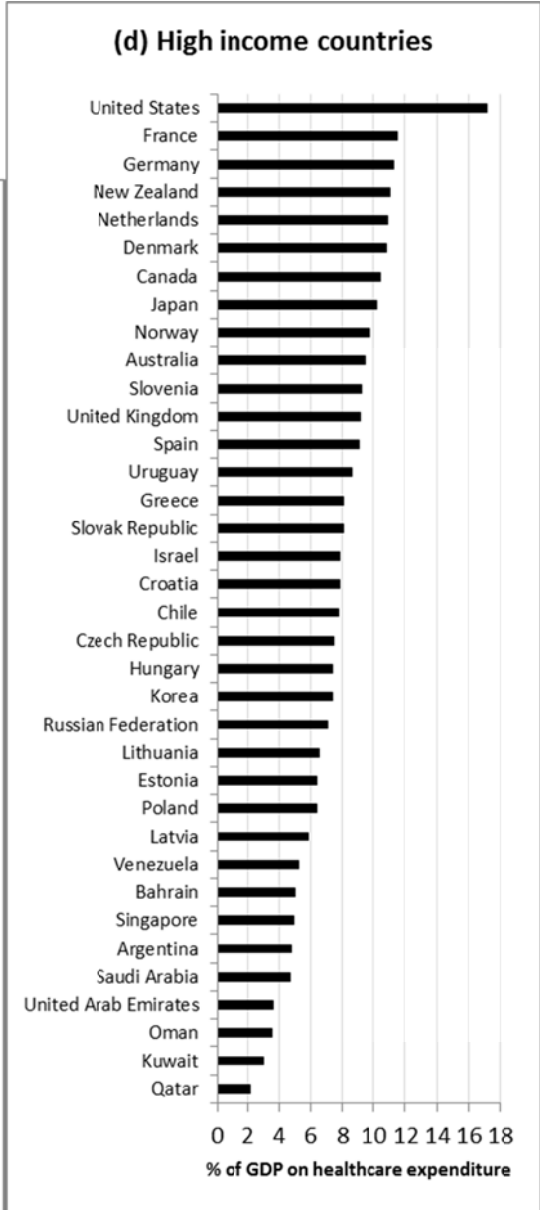

Supplement: mmc1.pdf [file mmc1.pdf]
