# Supplementary material
Source: PubMed Central journal article supplement (PMC6336224)
Supplement: mmc2.pdf [file mmc2.pdf]

Supplementary Figure 2.

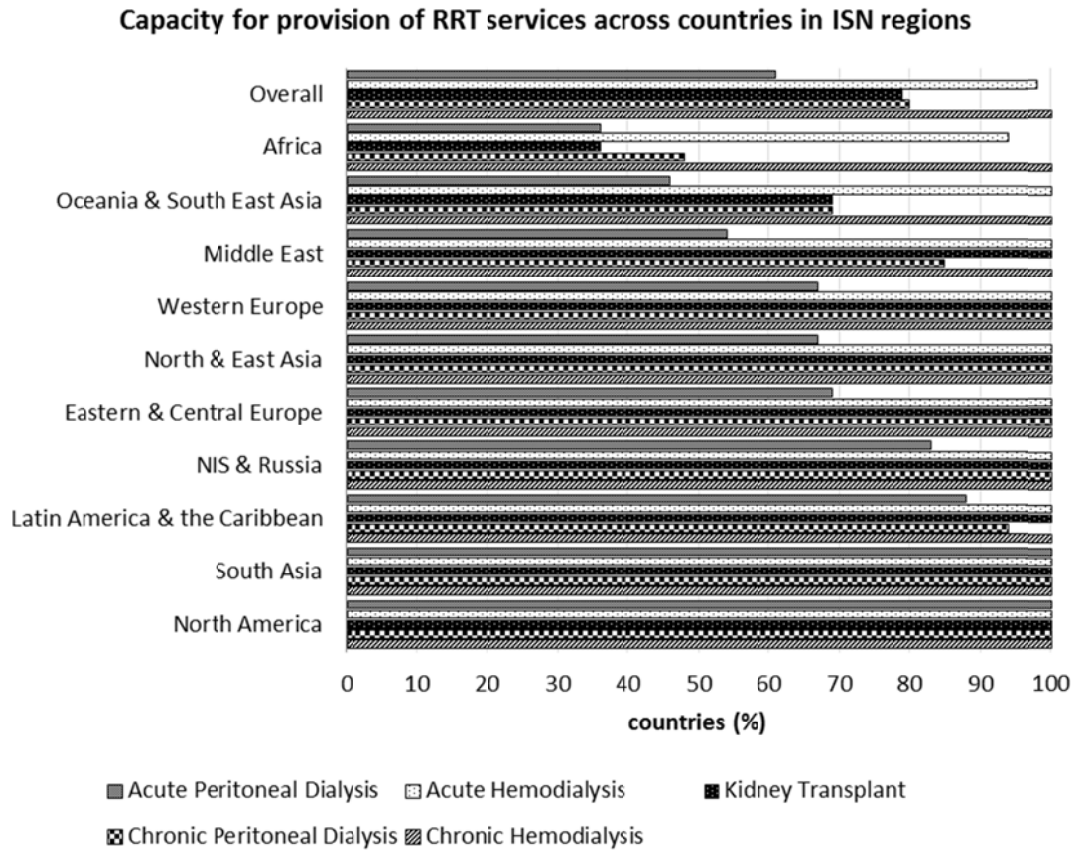

**Legend:** Capacities for renal replacement therapy (RRT) services across countries are reported as percentages of countries with availability of particular services in each region.
