# Supplementary material
Source: PubMed Central journal article supplement (PMC6336224)

**Supplementary Figure 10.**

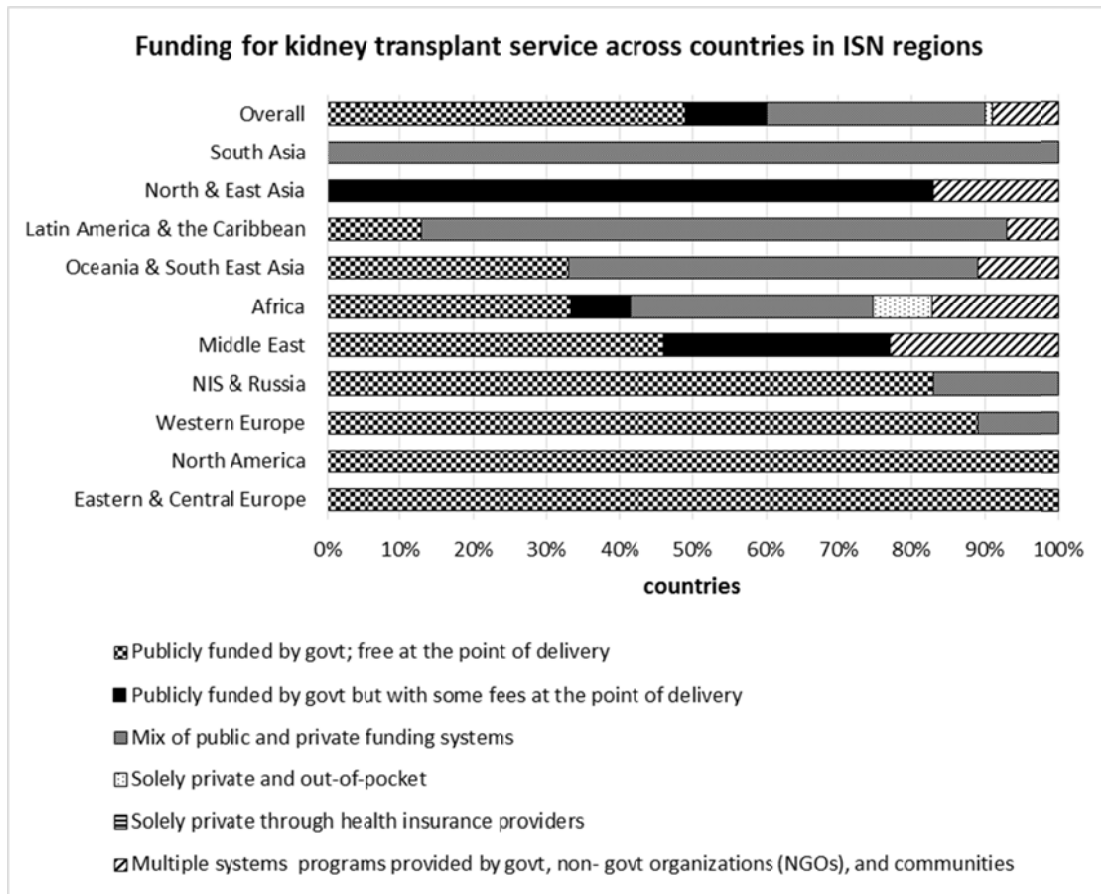

Supplement: mmc10.pdf [file mmc10.pdf]

**Supplementary Figure 11.**

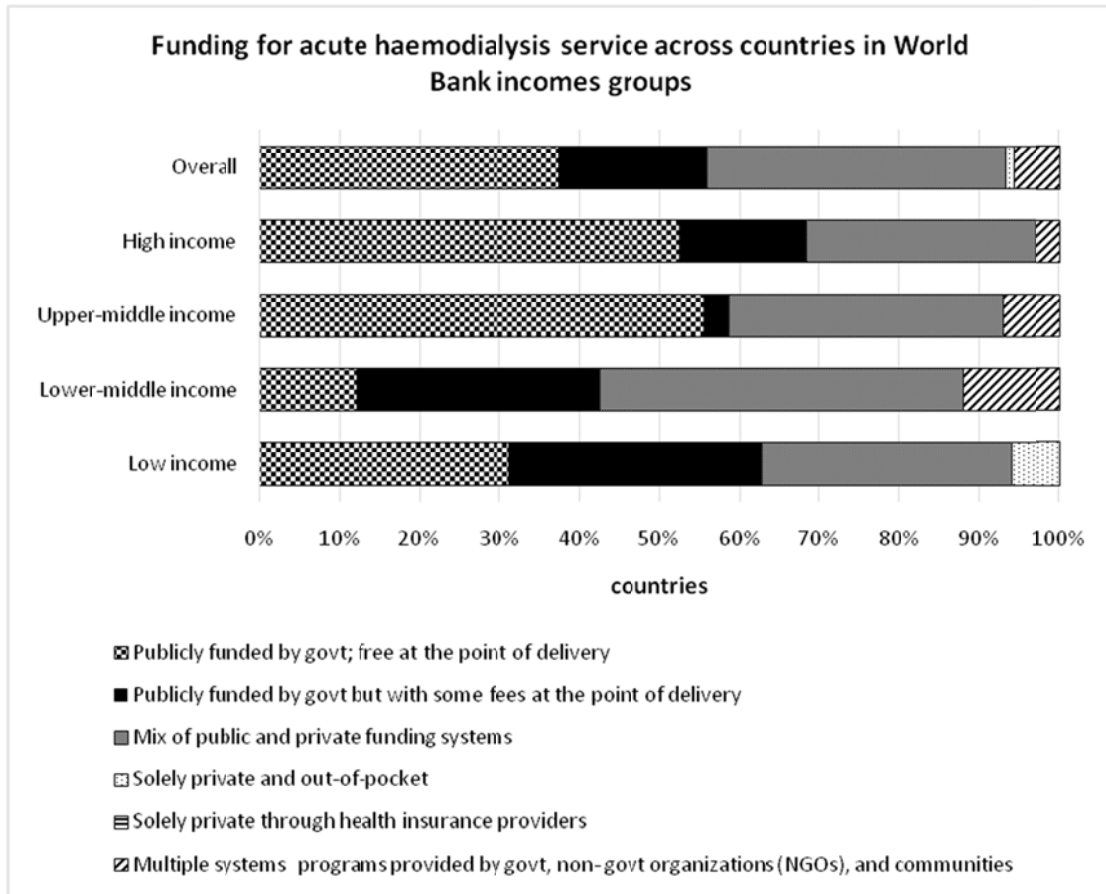

Supplement: mmc11.pdf [file mmc11.pdf]

**Supplementary Figure 12.**

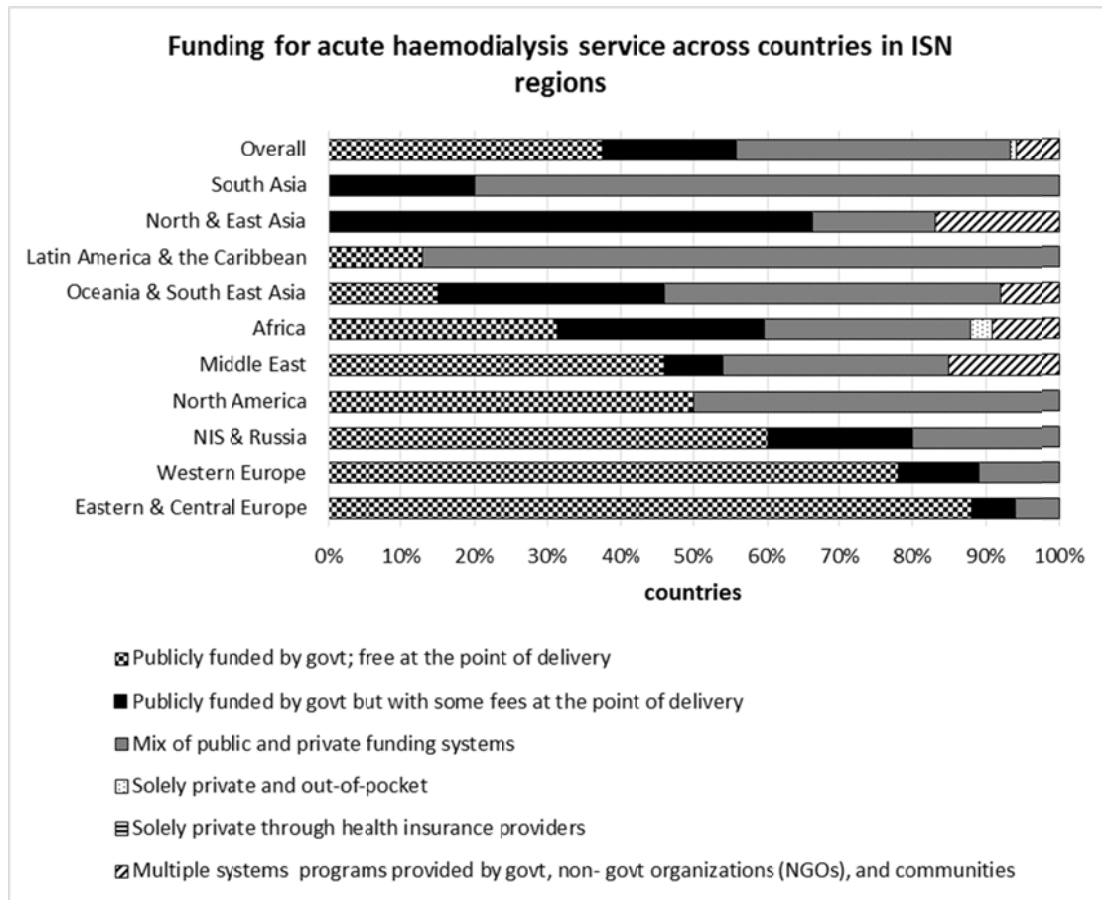

Supplement: mmc12.pdf [file mmc12.pdf]

**Supplementary Figure 13.**

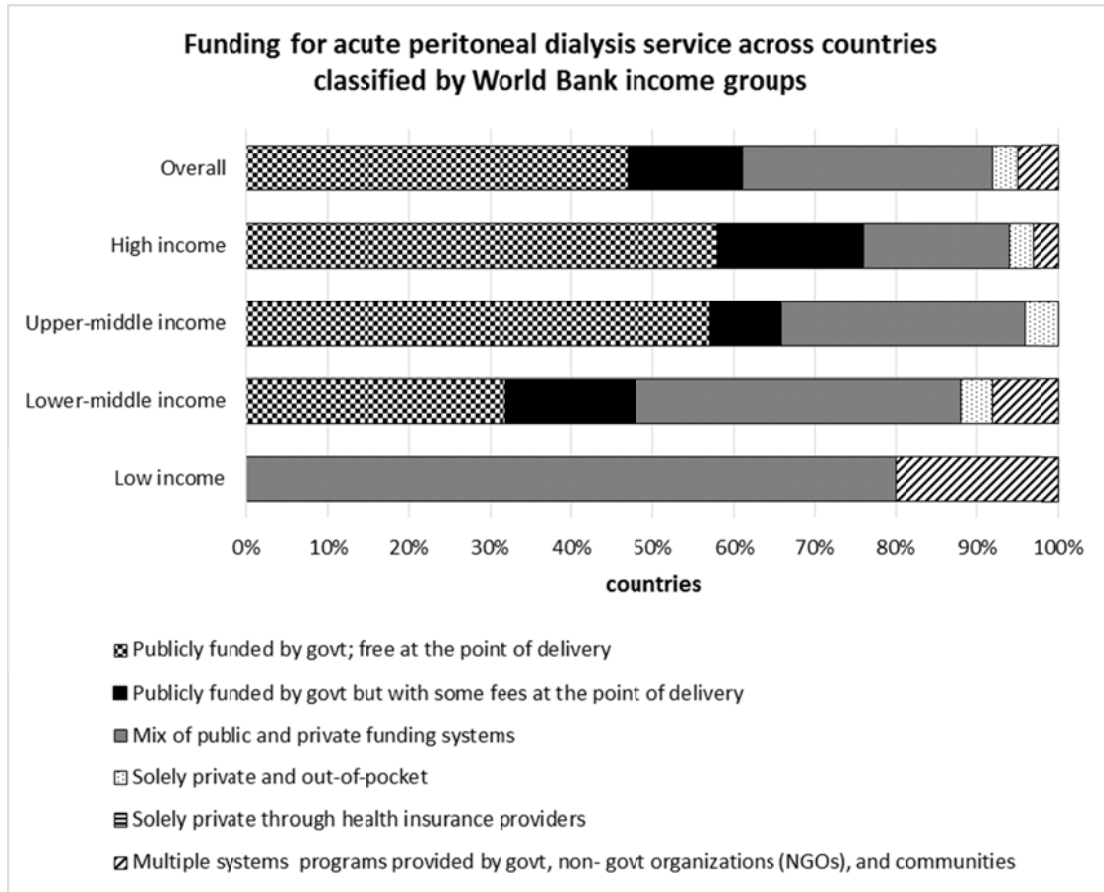

Supplement: mmc13.pdf [file mmc13.pdf]

**Supplementary Figure 14.**

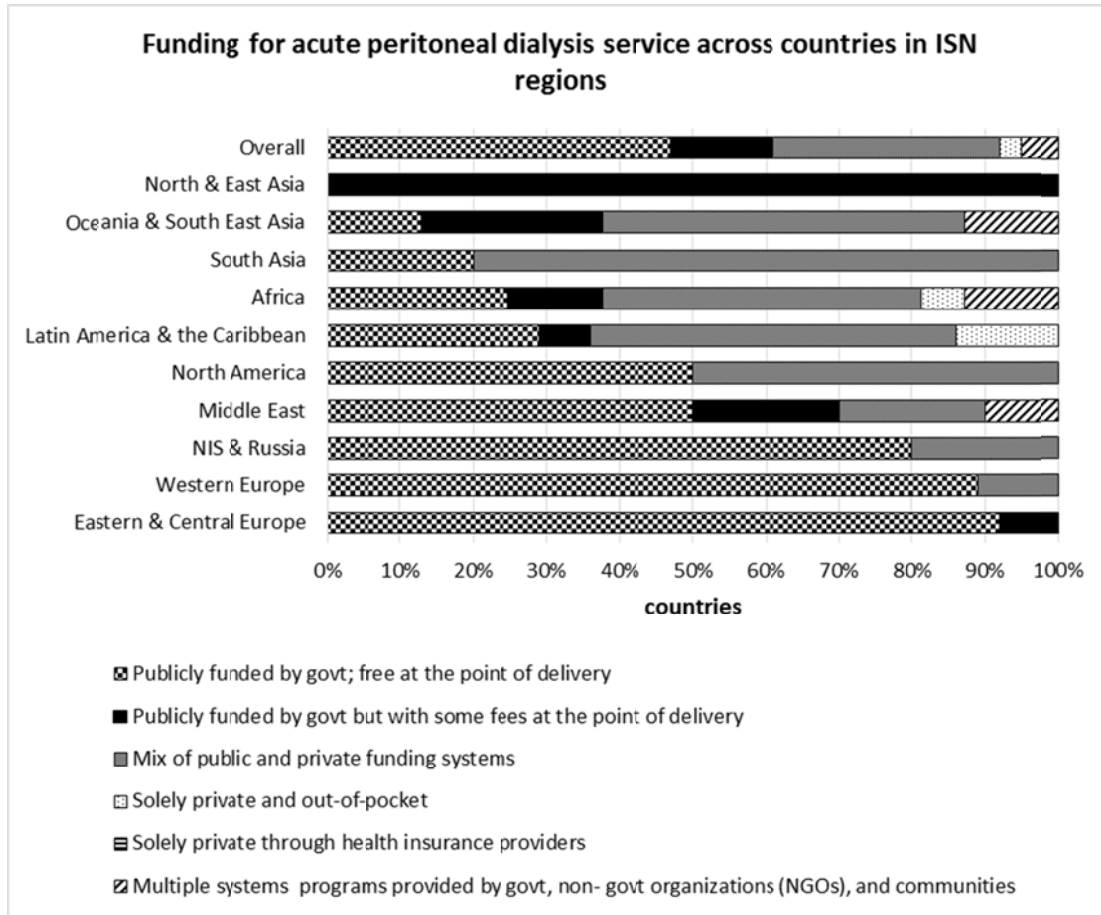

Supplement: mmc14.pdf [file mmc14.pdf]

**Supplementary Figure 15.**

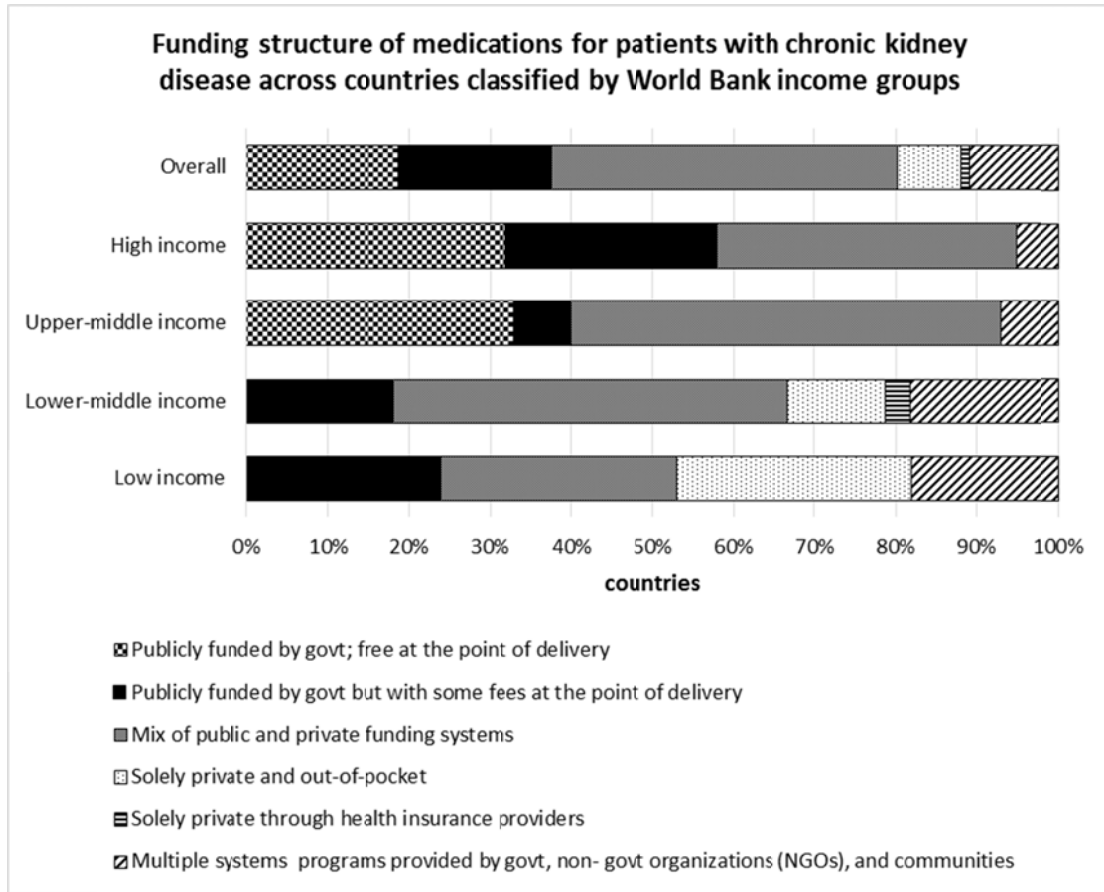

Supplement: mmc15.pdf [file mmc15.pdf]

**Supplementary Figure 16.**

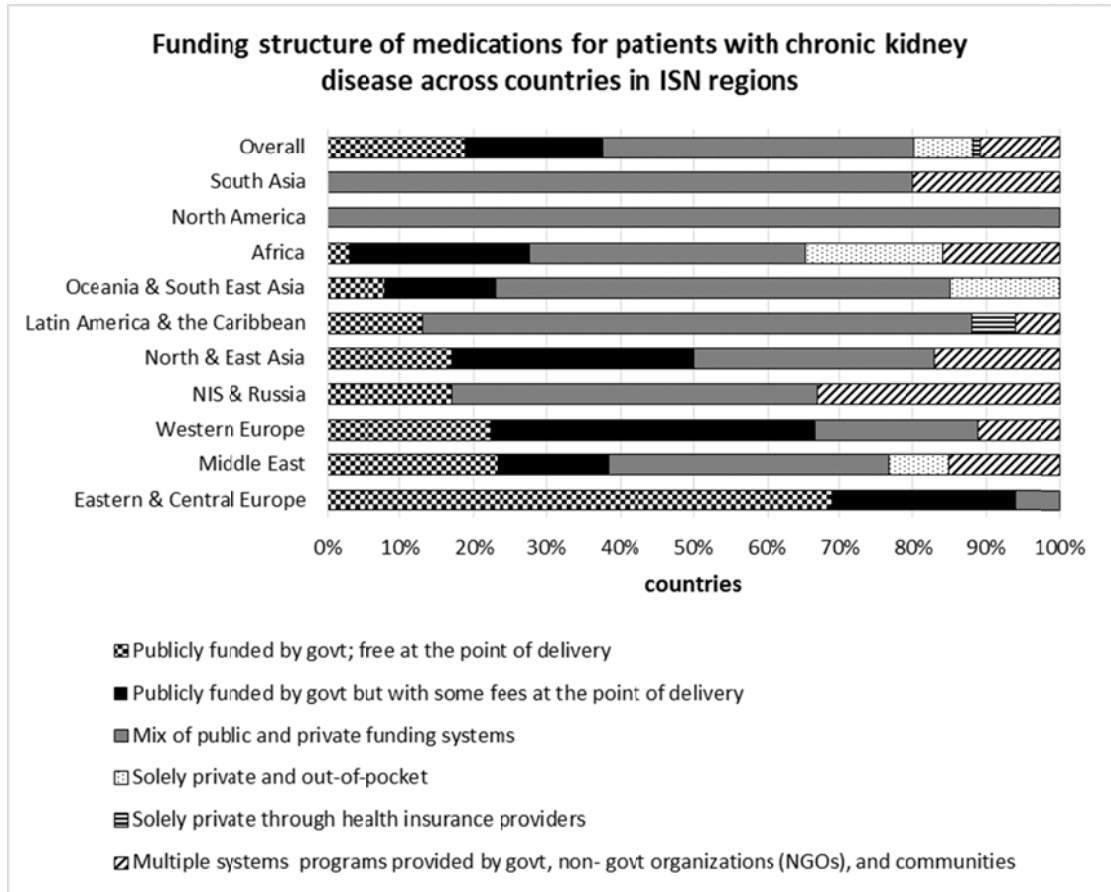

Supplement: mmc16.pdf [file mmc16.pdf]

**Supplementary Figure 17.**

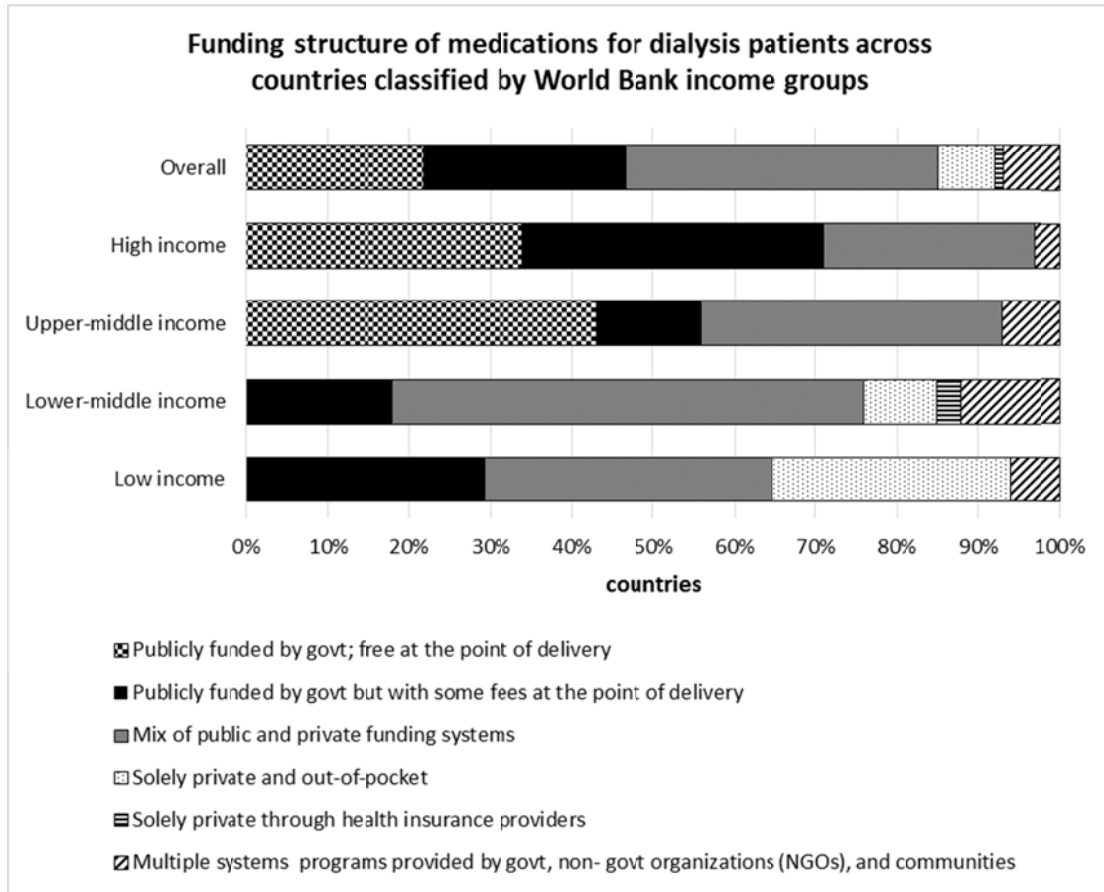

Supplement: mmc17.pdf [file mmc17.pdf]

**Supplementary Figure 19.**

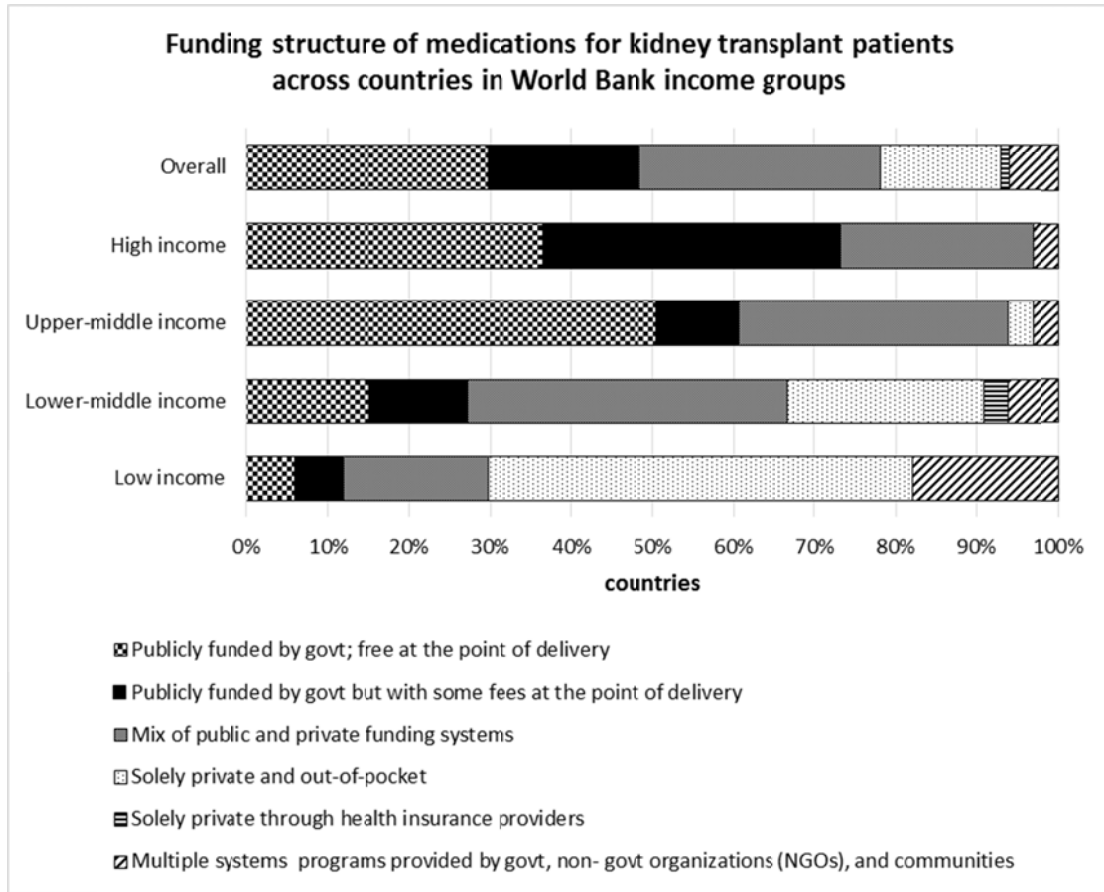

Supplement: mmc19.pdf [file mmc19.pdf]

**Supplementary Figure 20.**

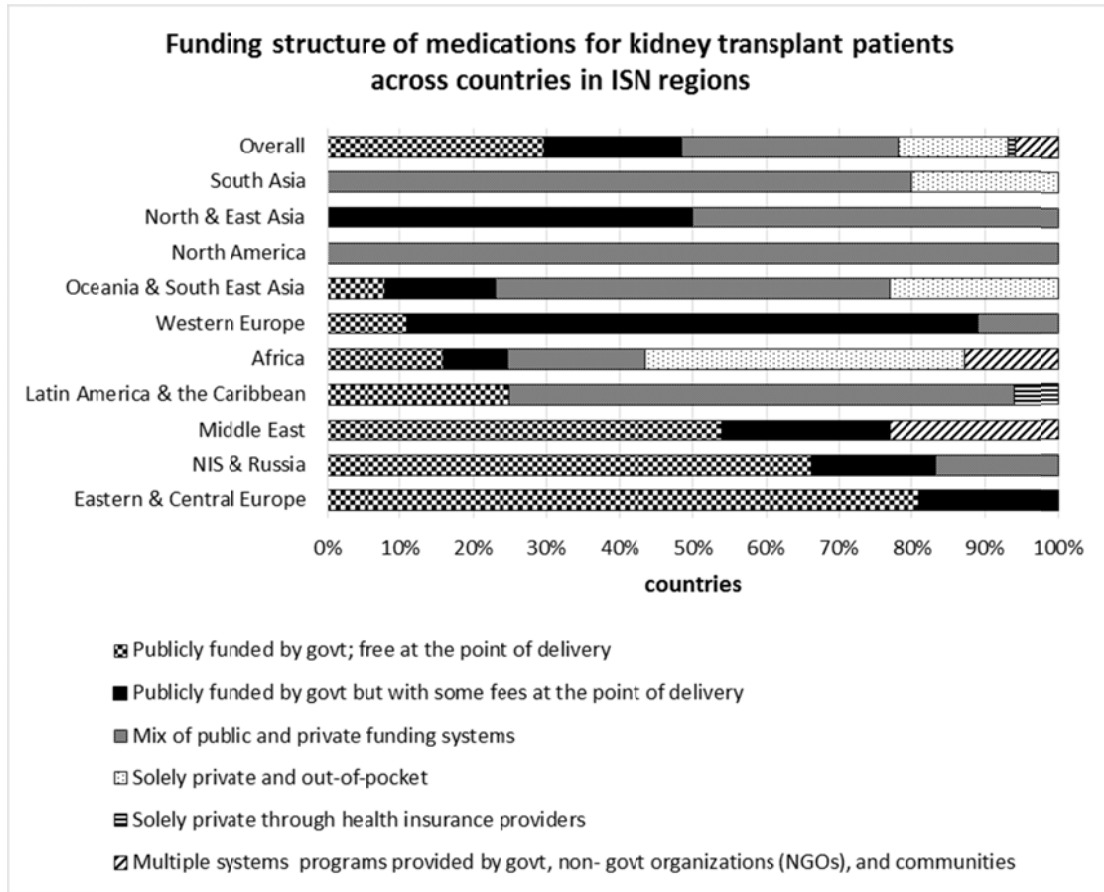

Supplement: mmc20.pdf [file mmc20.pdf]

Supplementary Figure 4.

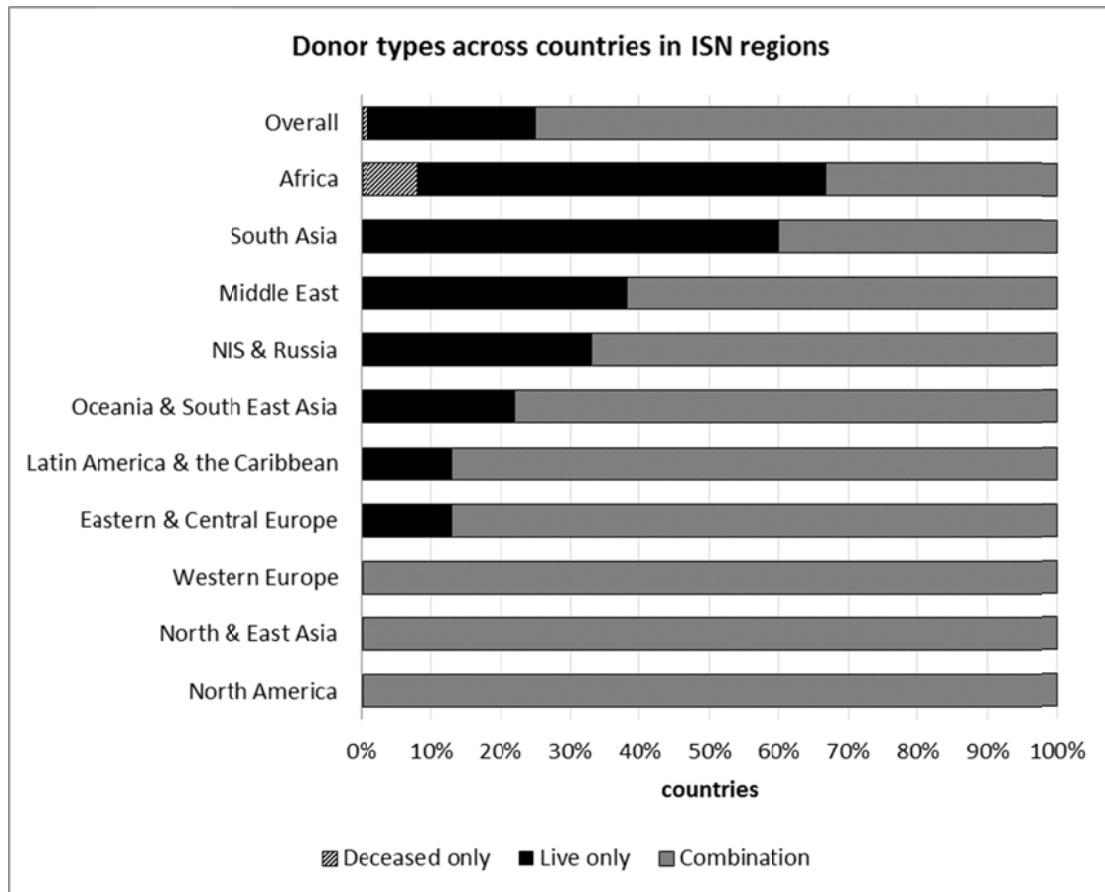

Supplement: mmc4.pdf [file mmc4.pdf]

**Supplementary Figure 5.**

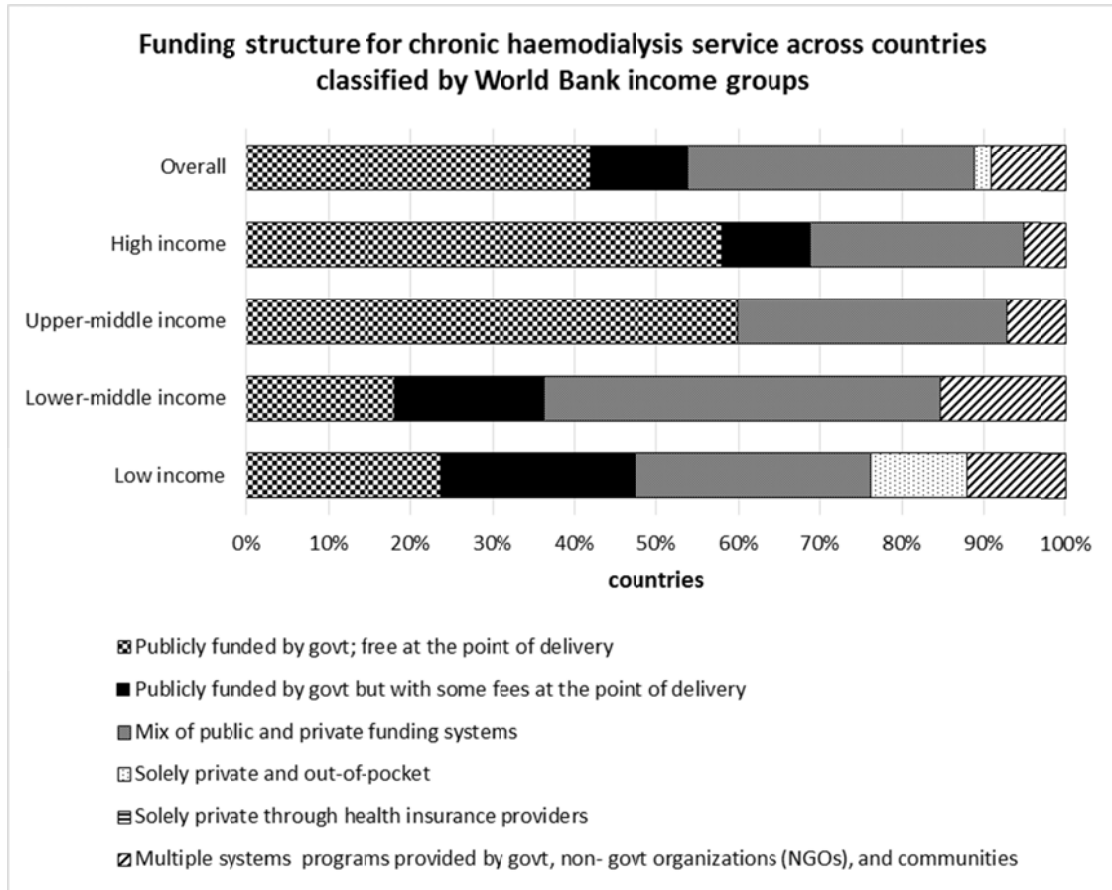

Supplement: mmc5.pdf [file mmc5.pdf]

**Supplementary Figure 6.**

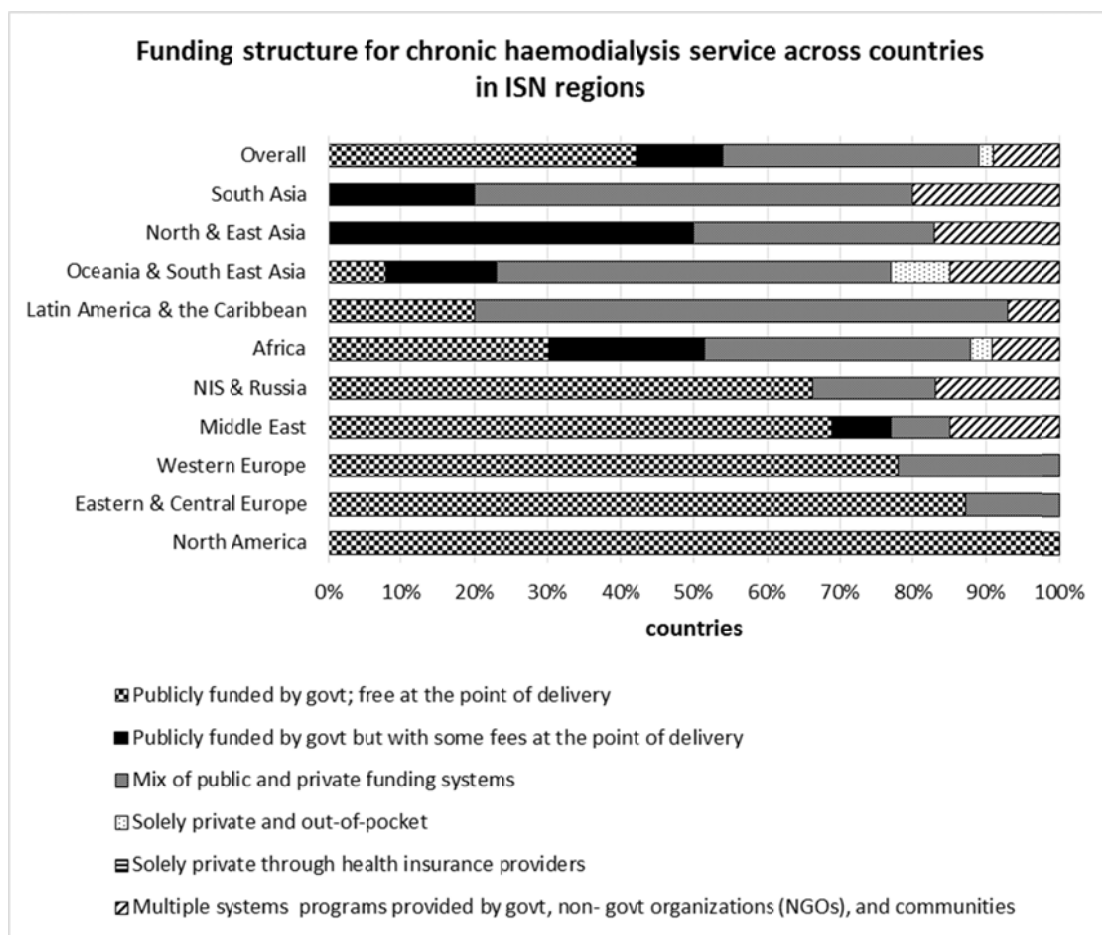

Supplement: mmc6.pdf [file mmc6.pdf]

**Supplementary Figure 7.**

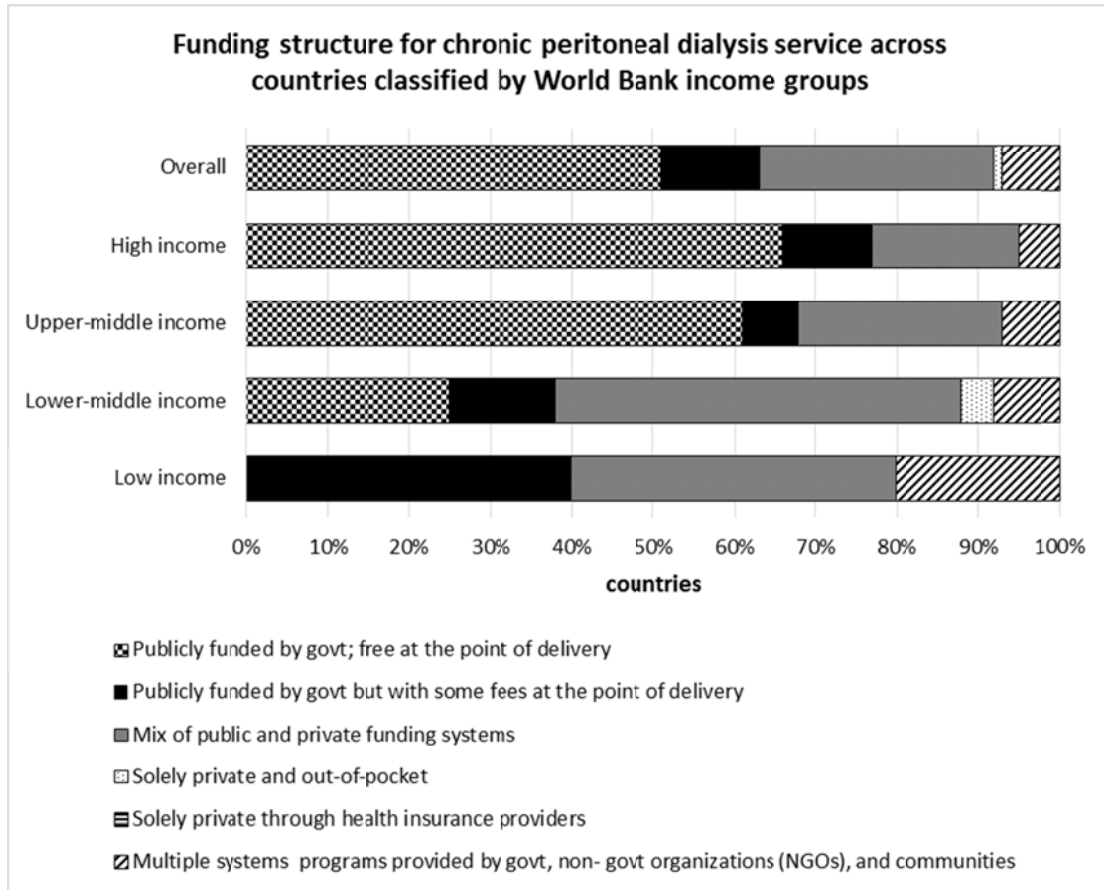

Supplement: mmc7.pdf [file mmc7.pdf]

**Supplementary Figure 8.**

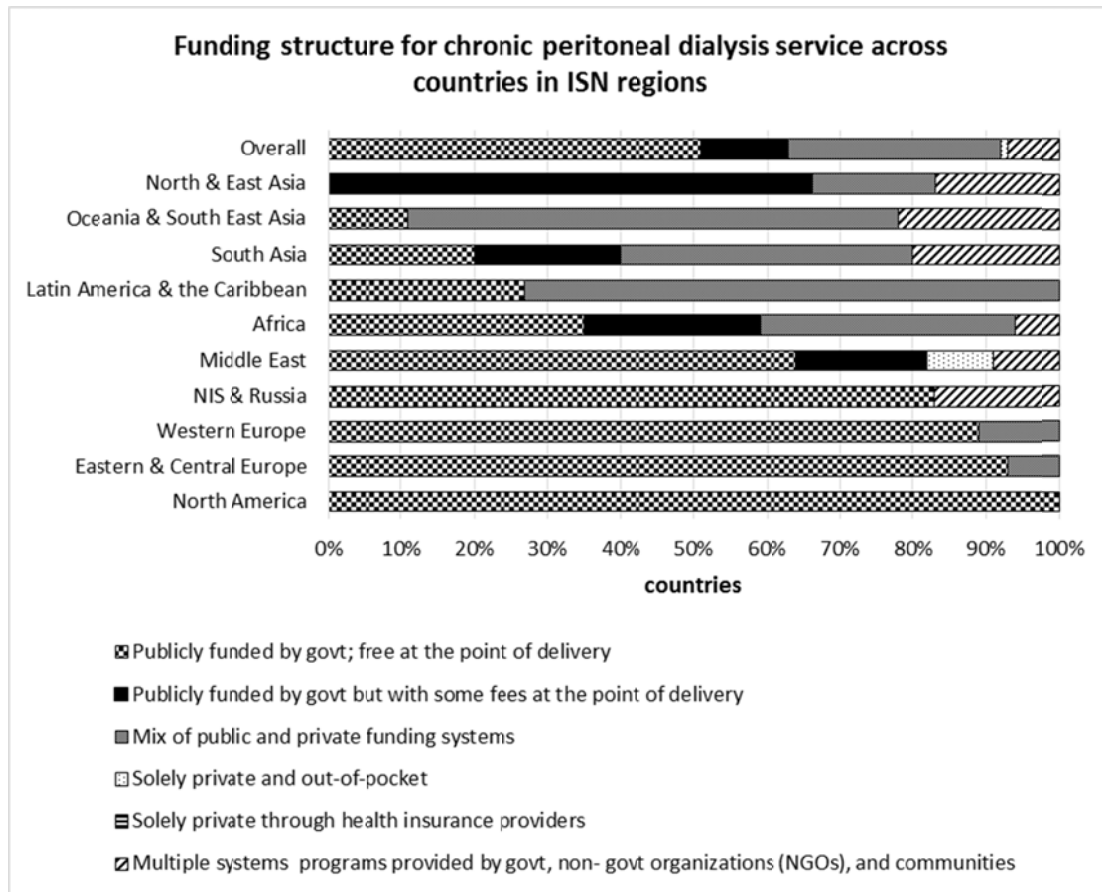

Supplement: mmc8.pdf [file mmc8.pdf]

**Supplementary Figure 9.**

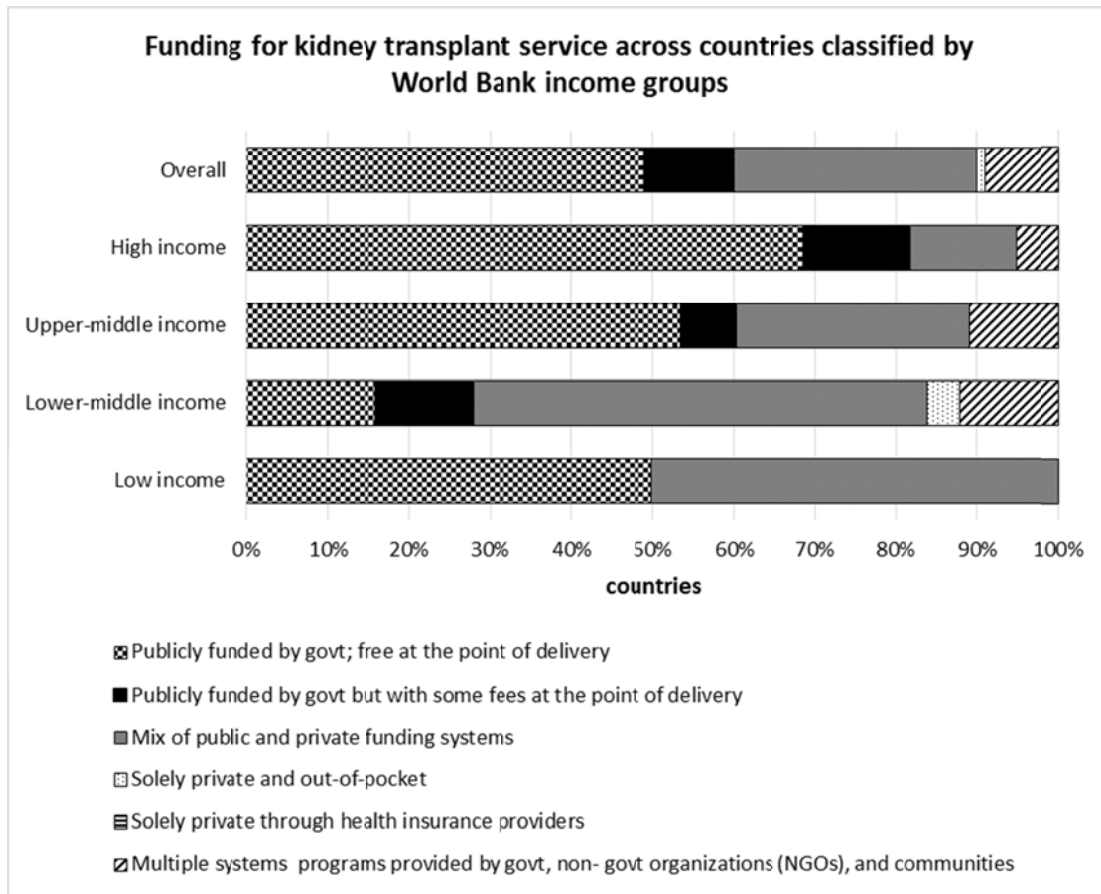

Supplement: mmc9.pdf [file mmc9.pdf]
